# Supplementary material for: Imprecision and DNA Break Repair Biased towards Incompatible End Joining in Leukemia
Source: Oxford University Press journal article supplement (doi:10.1158/1541-7786.mcr-17-0373), 2017-12-08
Supplement: 15417786mcr170373-sup-186288_3_supp_4363629_yz5hpg.xlsx [file 15417786mcr170373-sup-186288_3_supp_4363629_yz5hpg.xlsx]

## Sheet: Supp Table S1
amplicon #	sample	primer	primer	reads #	total reads fwd-rev (or reverse complement)
1	CLL-Mut	fwd	rev	105803	211838
		fwd	fwd	1
		rev	fwd	106035
		rev	rev	0
2	CLL-Mut	fwd	rev	52198	105340
		fwd	fwd	0
		rev	fwd	53142
		rev	rev	0
3	CLL-Mut	fwd	rev	161456	325120
		fwd	fwd	0
		rev	fwd	163664
		rev	rev	1
4	CLL-Mut	fwd	rev	61332	121647
		fwd	fwd	2
		rev	fwd	60315
		rev	rev	2
5	CLL-UM	fwd	rev	221521	446298
		fwd	fwd	0
		rev	fwd	224777
		rev	rev	0
6	CLL-UM	fwd	rev	47865	96000
		fwd	fwd	9
		rev	fwd	48135
		rev	rev	1
7	CLL-UM	fwd	rev	97659	199653
		fwd	fwd	1
		rev	fwd	101994
		rev	rev	0
8	B cells	fwd	rev	101249	209755
		fwd	fwd	5
		rev	fwd	108506
		rev	rev	0
9	B cells	fwd	rev	185088	373285
		fwd	fwd	1
		rev	fwd	188197
		rev	rev	0
16	B cells	fwd	rev	292648	587418
		fwd	fwd	1
		rev	fwd	294770
		rev	rev	2
				total	total fwd-rev
				2676380	2676354 (99.99903%)
supplemental table 5
Number of reads from plasmid assays corresponding to amplicons amplified by forward and reverse primer pairs.

## Sheet: Supp Table S2
supplemental table 1
	CLL-mut				CLL-UM
sample ID	9776	9820	10063	9954	9739	9956	10001
patient ID	606	554	554	237	293	660	676
BCR	mut	mut	mut	mut	UM	UM	UM
age (y)	73	85	85	71	83	81	48
sex	m	f	f	f	f	f	m
cd38	lo	lo	lo	lo	hi	lo	lo
vla4	hi	lo	lo	lo	lo	lo	lo
zap70	hi	lo	lo	lo	borderline	borderline	hi
RAI	0	0	0	1	1	1	0
chrom aberration	13q	13q	13q	13q	no	Tri15	13q
						t(11:14)
						13q
treatment	no	no	no	no	no	no	no
BCR: mutation status of the B cell receptor (mut: mutated; UM: unmutated)
chrom aberrations: chromosomal aberrations detected by karyotype analysis and FISH probes specific for del17p, del13q, del11q and t(11:14)
Patient information

## Sheet: Supp Table S3
substrate		CLL-Mut				CLL-UM			B cells
fwd	rev	amp1	amp2	amp3	amp4	amp5	amp6	amp13	amp14	amp15	amp16			mean CLL	mean B cells	significance
1	1	0.944681	1.14741	0.566977	7.10824	3.30221	4.44847	0.0845815	10.0121	2.48675	20.6891			2.51465	11.0627	0.244511
1	2	0.465481	0.751278	0.4374	0.961497	0.826483	0.957392	0.0593646	0.313756	0.721518	1.2776			0.636985	0.770958	0.692734
1	3	0.0401784	0.0478086	0.0077359	0.0897398	0.0737599	0.214492	0.00472816	0.00196712	0.0194192	0.0668837			0.0683489	0.0294233	0.277495
1	4	0.0112695	0.0068298	0.00161165	0.00427332	0.0134955	0.0100543	0	0	0.00218808	0.00681061			0.00679059	0.00299956	0.223515
1	5	1.1833	0.743473	0.308469	1.09568	0.566811	1.21657	0.0745998	0.397358	0.472351	1.02526			0.741272	0.631656	0.691325
1	6	0.388554	0.196113	0.118939	0.277766	0.140307	0.537346	0.0367746	0.015737	0.111045	0.15385			0.242257	0.0935439	0.090065
1	7	0.513009	0.340514	0.200489	0.460664	0.248969	0.634538	0.0714477	0.0309821	0.252176	0.200476			0.352804	0.161211	0.0985564
1	8	0.461071	0.313195	0.196298	0.388872	0.302718	0.464732	0.0241661	0.100815	0.262022	0.630942			0.307293	0.33126	0.896737
1	9	0.836886	0.68981	0.500899	1.10508	0.658022	1.14954	0.0288943	0.682099	0.612935	1.46498			0.709876	0.920004	0.542622
2	1	0.427752	0.674199	1.22678	1.35122	0.927932	1.71258	0.14237	1.02585	0.941967	2.25152			0.923263	1.40645	0.380399
2	2	1.46553	3.38075	1.36377	4.62288	3.27173	4.22839	1.16575	4.9773	5.38075	12.8832			2.78554	7.74709	0.188916
2	3	0.0656573	0.065371	0.0145048	0.120508	0.0693389	0.222312	0.0341478	0.00393424	0.0262569	0.0834736			0.0845484	0.0378883	0.229929
2	4	0.0112695	0.00975686	0.00290096	0.00427332	0.0144262	0.0223429	0	0	0.00601721	0.00401651			0.0092814	0.00334457	0.118739
2	5	1.41849	1.20205	0.431276	1.04525	0.661047	1.58746	0.428161	0.323591	0.741758	0.918384			0.967677	0.661244	0.266178
2	6	0.660003	0.390274	0.208547	0.416222	0.251528	1.52602	0.319413	0.020163	0.193645	0.209208			0.538858	0.141005	0.0660368
2	7	0.852075	0.670296	0.348438	0.57348	0.501427	2.1829	0.464935	0.0565547	0.442812	0.240642			0.799079	0.246669	0.0700411
2	8	0.816797	0.572728	0.576969	0.604248	0.431391	0.731729	0.174942	0.170156	0.590234	1.31881			0.5584	0.693068	0.730327
2	9	0.902053	0.986418	1.21711	0.92902	0.738529	1.25232	0.181771	0.537515	0.970685	1.7519			0.886746	1.0867	0.640482
3	1	0.187662	0.181478	0.175025	0.570061	0.277588	0.842326	0.0436041	0.0437684	0.129917	0.329703			0.325392	0.167796	0.282018
3	2	0.451271	0.437107	0.301055	0.67433	0.455357	0.928346	0.109798	0.0349164	0.229201	0.323766			0.479609	0.195961	0.0668667
3	3	0.0828066	0.0897631	0.0206291	0.359814	0.206621	0.49266	0.0241661	0.0186876	0.0410264	0.319225			0.182351	0.126313	0.660166
3	4	0.0127395	0.00585412	0.0022563	0.00256399	0.0158223	0.0134057	0	0.00049178	0.00218808	0.00366725			0.00752027	0.0021157	0.0715337
3	5	0.718311	0.364907	0.22144	0.499979	0.272004	0.695981	0.128711	0.0295068	0.118703	0.184585			0.414476	0.110932	0.0150558
3	6	0.367485	0.153183	0.169867	0.274347	0.116108	0.525058	0.103494	0.0108192	0.0541549	0.0848707			0.24422	0.0499482	0.0162525
3	7	0.401294	0.208797	0.183083	0.31708	0.212903	0.614429	0.170214	0.00442602	0.0754886	0.0642642			0.301114	0.0480596	0.00538833
3	8	0.293498	0.110253	0.121518	0.217939	0.114014	0.25806	0.0294196	0.0113109	0.0683774	0.104429			0.163529	0.0613726	0.0547157
3	9	0.409133	0.228311	0.207258	0.364087	0.176139	0.454677	0.0635674	0.0363917	0.103113	0.183886			0.271882	0.107797	0.0460782
4	1	0.204812	0.175623	0.0693007	0.431605	0.22221	0.770829	0.108748	0.0462273	0.176414	0.230513			0.283304	0.151051	0.252523
4	2	0.411583	0.578582	0.262376	0.504252	0.379503	1.01102	0.289468	0.0644232	0.34216	0.273647			0.490968	0.226743	0.0779727
4	3	0.0808467	0.0770792	0.00805823	0.220503	0.190333	0.405523	0.0246915	0.0191794	0.0765827	0.373012			0.143862	0.156258	0.925347
4	4	0.0465481	0.0282949	0.00483494	0.0393146	0.283405	0.150814	0.00262675	0.00196712	0.0505993	0.345944			0.0794056	0.132837	0.67722
4	5	0.947131	0.637123	0.293319	0.564078	0.359492	0.985321	0.348833	0.137698	0.348178	0.345245			0.590757	0.27704	0.0403995
4	6	0.395904	0.18538	0.144081	0.234178	0.11541	0.564158	0.181771	0.0127863	0.0752151	0.0688046			0.260126	0.0522687	0.0142508
4	7	0.528198	0.34149	0.230788	0.350412	0.234775	0.718323	0.38876	0.00639314	0.145234	0.0787586			0.398964	0.0767951	0.00301836
4	8	0.324367	0.170745	0.129576	0.20341	0.0930724	0.301629	0.104545	0.0172123	0.131558	0.133767			0.189621	0.0941792	0.121299
4	9	0.473811	0.417594	0.200489	0.322208	0.194056	0.61778	0.190702	0.0516369	0.249441	0.240642			0.345234	0.180573	0.118152
5	1	0.365035	0.393201	0.191141	0.823042	0.463966	0.729495	0.196481	0.0673738	0.181063	0.329703			0.451766	0.192713	0.0665171
5	2	0.701161	1.00983	0.607913	1.01534	0.84277	1.20875	0.547416	0.106224	0.449103	0.364455			0.847598	0.306594	0.00993577
5	3	0.0837866	0.0897631	0.0222407	0.186317	0.0639873	0.232366	0.0394013	0.00344246	0.027898	0.0860931			0.102552	0.0391445	0.141379
5	4	0.0166593	0.0068298	0.00451261	0.00769198	0.00698043	0.00558572	0.0021014	0	0.00246159	0.00174631			0.00719446	0.00140263	0.0159912
5	5	2.39404	2.18944	0.880603	2.05461	1.08709	1.32046	1.48884	0.106224	0.467975	0.660454			1.63073	0.411551	0.00244923
5	6	0.98339	0.586387	0.396142	0.653818	0.45908	0.955158	0.370898	0.0477027	0.229474	0.253913			0.629268	0.17703	0.00468798
5	7	5.41477	5.03454	25.7657	9.50301	7.65334	4.63056	4.34255	16.9064	9.38192	9.42257			8.90635	11.9036	0.459761
5	8	0.662943	0.385396	0.261087	0.367506	0.174045	0.292692	0.137117	0.0152452	0.151524	0.196809			0.325826	0.121193	0.0477792
5	9	0.710471	0.552238	0.317816	0.523909	0.357863	0.557455	0.287367	0.0531122	0.250808	0.23645			0.472446	0.180124	0.0169577
6	1	1.5111	0.767865	0.677536	0.901671	0.982612	1.50144	2.20542	0.171631	0.452111	0.250072			1.22109	0.291271	0.00355999
6	2	2.63805	2.57679	1.35314	1.13841	2.29935	3.66088	4.13136	0.531122	1.64297	0.391523			2.54257	0.855206	0.0245301
6	3	0.389044	0.119034	0.140535	0.225631	0.119133	0.365306	0.214868	0.0073767	0.0629072	0.0735197			0.224793	0.0479345	0.00591952
6	4	0.0391984	0.00878117	0.0257863	0.00256399	0.00674775	0.0212257	0.00788026	0	0.00355562	0.00331799			0.0160262	0.0022912	0.0332134
6	5	3.01681	3.43832	3.30806	1.5666	2.72958	2.5739	2.29894	0.811929	1.76277	0.580124			2.7046	1.05161	0.0197399
6	6	11.6047	18.1321	25.2519	22.0777	27.1564	9.90013	28.3027	40.5286	32.7708	19.8697			20.3465	31.0564	0.208076
6	7	2.60179	2.04309	1.53525	0.831588	2.88478	4.43953	4.21594	0.242939	0.850068	0.136387			2.65028	0.409798	0.00387333
6	8	1.50865	1.14155	0.79583	0.735866	0.53982	0.907121	0.749676	0.0954053	0.774579	0.326036			0.911216	0.398673	0.100803
6	9	1.296	1.28303	0.654328	0.714499	0.897683	0.980852	1.44471	0.21835	0.826819	0.235926			1.03873	0.427032	0.0668349
7	1	1.66348	1.09374	0.942168	1.23243	1.49404	1.25567	1.38535	0.786356	1.271	0.830021			1.29527	0.962459	0.148016
7	2	2.58807	2.82754	1.44049	1.50848	2.85057	2.44319	2.94932	1.20929	2.58029	0.673203			2.37252	1.48759	0.25448
7	3	0.781028	0.360028	0.426441	0.606812	0.616605	0.856849	0.143421	0.27638	0.56425	1.61499			0.541598	0.818539	0.569452
7	4	0.126415	0.0400031	0.0879958	0.0111106	0.104474	0.0759658	0.00735491	0.00049178	0.0648218	0.0639149			0.0647598	0.0430762	0.467798
7	5	2.27547	2.63142	1.22904	1.21191	1.47427	1.39084	1.54033	0.32064	1.17144	0.443563			1.67904	0.645215	0.0309017
7	6	1.31805	1.20107	0.888661	0.832443	0.692691	1.70364	1.03547	0.141141	0.493685	0.165026			1.096	0.266617	0.00214149
7	7	3.52737	4.79354	2.46163	2.67339	4.0896	3.77595	10.3468	0.762751	2.59807	0.549389			4.52404	1.3034	0.028625
7	8	1.54393	1.22644	0.897686	0.703389	0.44349	0.613312	0.522199	0.108683	0.905043	0.411955			0.850063	0.475227	0.250741
7	9	1.52041	1.64793	0.958284	0.875176	1.07708	0.860201	1.02759	0.575382	1.42198	0.483903			1.1381	0.827087	0.412819
8	1	1.70415	0.701518	0.950548	0.977736	0.961438	0.987555	0.631472	0.720458	0.880974	1.02596			0.987774	0.875796	0.499554
8	2	2.60865	2.19334	1.37022	1.38968	1.82492	1.33387	1.82454	0.956512	1.88065	0.992777			1.79218	1.27665	0.226038
8	3	0.454211	0.158061	0.122163	0.189735	0.141935	0.223429	0.120305	0.00934382	0.0670098	0.148436			0.201406	0.07493	0.0755963
8	4	0.105836	0.0195137	0.0393241	0.00427332	0.0221047	0.03128	0.00840561	0.00049178	0.01559	0.00925544			0.0329625	0.00844576	0.115689
8	5	2.83845	2.33579	1.82825	1.3102	1.64482	1.06129	0.87681	0.256217	0.87523	0.617495			1.69937	0.582981	0.00854775
8	6	1.12548	0.679077	0.597598	0.466647	0.371824	0.744018	0.614135	0.0467191	0.224278	0.145992			0.656969	0.138996	0.00113343
8	7	1.52678	1.15229	0.887049	0.76407	0.69688	1.04788	1.4547	0.18245	0.450197	0.156993			1.07566	0.263213	0.000961191
8	8	2.25097	1.78355	0.989228	1.51703	0.805542	0.745135	0.985033	0.433258	1.74909	2.58			1.29664	1.58745	0.695219
8	9	1.25729	1.10448	0.699776	0.581172	0.635219	0.540698	0.415027	0.313264	0.82299	0.458057			0.747665	0.531437	0.315645
9	1	1.45965	0.828357	0.752316	1.12474	0.937704	1.12943	1.17784	0.256709	0.458949	0.36917			1.05858	0.361609	0.000206069
9	2	3.16478	3.58857	1.68514	1.76659	2.85127	2.85765	3.57922	1.16847	1.86424	0.64823			2.78475	1.22698	0.0196023
9	3	0.404233	0.111228	0.17019	0.214521	0.128207	0.301629	0.148674	0.00540958	0.0443085	0.0740435			0.21124	0.0412539	0.0054671
9	4	0.0563477	0.00878117	0.0228854	0.00598265	0.00884188	0.0111714	0.0021014	0	0.00656423	0.00366725			0.0165874	0.00341049	0.115765
9	5	2.13043	2.1709	1.32767	1.02218	0.996107	1.14842	1.19307	0.143108	0.583669	0.270154			1.42697	0.33231	0.00160861
9	6	1.07894	0.792257	0.859329	0.559805	0.445351	1.73157	0.888368	0.0467191	0.199388	0.0839975			0.907946	0.110035	0.00198249
9	7	3.80763	4.69695	3.21459	2.6016	4.89631	2.95931	6.7371	9.08367	7.75181	1.86646			4.1305	6.23398	0.44485
9	8	1.67622	1.34352	1.13718	0.898252	0.540751	0.583149	0.87681	0.158353	0.630166	0.395714			1.00798	0.394744	0.0215455
9	9	3.2667	4.17203	1.35056	4.31178	3.60376	1.85446	2.9157	2.90691	3.48342	2.63309			3.06786	3.0078	0.905908
intramolecular events		25.5833	35.7169	32.8901	44.7648	43.8064	26.9165	45.3162	59.7478	49.0285	60.5301
intermolecular events		74.4167	64.2831	67.1099	55.2352	56.1936	73.0835	54.6838	40.2522	50.9715	39.4699
ratio intra/intermolecular		0.343785	0.55562	0.490094	0.810438	0.779561	0.368297	0.828696	1.48434	0.96188	1.53357
ratio inter/intramolecular		2.9088	1.79979	2.04043	1.2339	1.28277	2.7152	1.20671	0.673701	1.03963	0.652071
supplemental table 2
Plasmid assay data for all inter- and intramolecular junctions in CLL and B cells.

## Sheet: Suppl Table S4
													t test		mean			STD
tag	CLL-Mut				CLL-UM				B cells				CLL vs B		CLL	B		CLL	B
1	3.69292	3.21144	1.72399	15.8824	7.53818	16.5393	0.185505		16.7578	5.07164	34.1807		0.298351		6.96768	18.67		6.70499	14.6484
2	5.72901	9.46485	4.1458	10.3254	7.46806	15.7042	2.57156		8.33114	10.974	21.2835		0.28927		7.91555	13.5296		4.40873	6.84392
3	0.323705	0.251449	0.062726	0.802047	0.471701	1.83216	0.0533327		0.0312798	0.0836904	0.52745		0.280979		0.542445	0.21414		0.624185	0.272597
4	0.181965	0.0765278	0.0147014	0.0878432	0.646995	0.560864	0.00579703		0.00329262	0.103218	0.571597		0.996034		0.224956	0.226036		0.266417	0.303407
5	9.3568	6.12223	2.67762	4.58885	2.48174	4.91068	3.28576		0.177801	0.954629	1.09097		0.0038364		4.77481	0.741133		2.40613	0.492599
6	45.3628	50.7762	76.7796	49.3202	61.9936	36.7719	62.4596		67.8311	66.8402	32.8266		0.938825		54.7805	55.8326		13.2527	19.93
7	13.7852	13.4224	7.48106	5.97143	9.33574	14.0133	22.8322		1.27671	5.29983	0.907457		0.00474325		12.4059	2.49467		5.61708	2.43635
8	8.7975	4.99344	3.00791	3.38769	1.83687	2.77108	2.17273		0.725198	3.568	4.26202		0.510608		3.85246	2.85174		2.40617	1.87405
9	12.7701	11.6814	4.1066	9.63411	8.22714	6.89655	6.43355		4.86566	7.10476	4.34973		0.0640991		8.53564	5.44005		3.05096	1.46458
supplemental table 3
Plasmid assay data for the most frequent intramolecular junctions in CLL and B cells.

## Sheet: Supp Table S5
substrate		CLL-Mut				CLL-UM			B cells
fwd	rev	amp1	amp2	amp3	amp4	amp5	amp6	amp13	amp14	amp15	amp16			mean CLL	mean B cells	significance	microhomology of signifivcantly different junctions	sequence
1	1	2.0606	1.8908	0.784328	10.646	4.85582	10.8149	0.0393064	11.1042	3.08267	23.6751			4.44168	12.6207	0.303535		GCAAATGGCATTCTGACATCCAAAATGGAGAAAAAAATCACTGGATATACCACCGTTGATATATCCCAATGGCATCGTAAAGAACATTTTGAGGCATTTCAGTCAGTTGCTCAATGTACCTATAACCAGACCGTTCAGCTGATGGGAAAGACGGTGAGCTGGTGATATGGGATAGTGTTCACCCTTGTTACACCGTTTTCCATGAGCAAACTGAAACGTTTTCATCGCTCTGGAGTGAATACCACGACGATTTCCGGCAGTTTCTGCTTGTCAATTGGAACCAGTC
1	2	0.765678	1.10014	0.391571	1.10444	0.944565	1.70968	0.0302357	0.29805	0.795072	1.31769			0.863758	0.803605	0.87478		GCAAATGGCATTCTGACATCCAAAATGGAGAAAAAAATCACTGGATATACCACCGTTGATATATCCCAATGGCATCGTAAAGAACATTTTGAGGCATTTCAGTCAGTTGCTCAATGTACCTATAACCAGACCGTTCAGCTGATGCTGATTATGGACAACTTCTTCGCCCCCGTTTTCACCATGGGCAAATATTATACGCAAGGCGACAAGGTGCTGATGCCGCTGGCGATTCAGGTTCATCATGCCGTCTGTGATGGCTTCCATGTCGGCTTGTCAATTGGAACCAGTC
1	3	0.023487	0.0225902	0.00473914	0.037857	0.0582351	0.303387	0	0	0.00887447	0.0319806			0.064328	0.0136183	0.264844		GCAAATGGCATTCTGACATCCAAAATGGAGAAAAAAATCACTGGATATACCACCGTTGATATATCCCAATGGCATCGTAAAGAACATTTTGAGGCATTTCAGTCAGTTGCTCAATGTACCTATAACCAGACCGTTCAGCTGATACGTCTGGCTACATTGTATTGGCATGTAAAAAATAAGCGGGCTTTGCTCGACGCCTTAGCCATTGAGATGTTAGATAGGCACCATACTCACTTTTGCCCTTTAGAAGGGGAAAGCTGGCAAGATTTTGCTTGTCAATTGGAACCAGTC
1	4	0.00939482	0.00677706	0	0.00329191	0.0123904	0.00713852	0	0	0.00201693	0.00509835			0.00557039	0.00237176	0.208945		GCAAATGGCATTCTGACATCCAAAATGGAGAAAAAAATCACTGGATATACCACCGTTGATATATCCCAATGGCATCGTAAAGAACATTTTGAGGCATTTCAGTCAGTTGCTCAATGTACCTATAACCAGACCGTTCAGCTGATAGCTTTGGCTTTTTATGCCAACAAGGTTTTTCACTAGAGAATGCATTATATGCACTCAGCGCTGTGGGGCATTTTACTTTAGGTTGCGTATTGGAAGATCAAGAGCATCAAGTCGCTAAAGAAGAAAGCTTGTCAATTGGAACCAGTC
1	5	1.48282	0.761289	0.148691	1.09456	0.590611	1.95952	0.0302357	0.3256	0.430815	0.878075			0.866818	0.54483	0.334992		GCAAATGGCATTCTGACATCCAAAATGGAGAAAAAAATCACTGGATATACCACCGTTGATATATCCCAATGGCATCGTAAAGAACATTTTGAGGCATTTCAGTCAGTTGCTCAATGTACCTATAACCAGACCGTTCAGCTGATGATCTCATGGCCAAGTTGACCAGTGCCGTTCCGGTGCTCACCGCGCGCGACGTCGCCGGAGCGGTCGAGTTCTGGACCGACCGGCTCGGGTTCTCCCGGGACTTCGTGGAGGACGACTTCGCCGGCTTGTCAATTGGAACCAGTC
1	6	0.449385	0.23042	0.0473914	0.271583	0.133817	0.778099	0.00453535	0.00876616	0.10488	0.121433			0.273604	0.0783599	0.109935		GCAAATGGCATTCTGACATCCAAAATGGAGAAAAAAATCACTGGATATACCACCGTTGATATATCCCAATGGCATCGTAAAGAACATTTTGAGGCATTTCAGTCAGTTGCTCAATGTACCTATAACCAGACCGTTCAGCTGATAGCTTGAGGTCGTGTCCACGAACTTCCGGGACGCCTCCGGGCCGGCCATGACCGAGATCGGCGAGCAGCCGTGGGGGCGGGAGTTCGCCCTGCGCGACCCGGCCGGCAACTGCGTGCACTTCGTGCTTGTCAATTGGAACCAGTC
1	7	0.613795	0.393069	0.0876741	0.459221	0.259373	1.00296	0.0393064	0.0288031	0.265427	0.190725			0.407915	0.161652	0.12447		GCAAATGGCATTCTGACATCCAAAATGGAGAAAAAAATCACTGGATATACCACCGTTGATATATCCCAATGGCATCGTAAAGAACATTTTGAGGCATTTCAGTCAGTTGCTCAATGTACCTATAACCAGACCGTTCAGCTGATCTAGCAGCATGAGAATCCACGTGACCGAGGGCGCCCCCCTGCCCTTCGCCTTCGACATCCTGGCCCCCTGCTGCGAGTACGGCAGCAGGACCTTCGTGCACCACACCGCCGAGATCCCCGACTTGCTTGTCAATTGGAACCAGTC
1	8	0.796994	0.478912	0.213854	0.531643	0.431601	0.985116	0.00302357	0.102689	0.310607	0.676227			0.491592	0.363174	0.569693		GCAAATGGCATTCTGACATCCAAAATGGAGAAAAAAATCACTGGATATACCACCGTTGATATATCCCAATGGCATCGTAAAGAACATTTTGAGGCATTTCAGTCAGTTGCTCAATGTACCTATAACCAGACCGTTCAGCTGATATCTGAAGGTGCACGGCACCAACTTCCCCGCCGACGGCCCCGTGATGAAGAACAAGAGCGGCGGCTGGGAGCCCAGCACCGAGGTGGTGTACCCCGAGAACGGCGTGCTGTGCGGCCGGAACGCTTGTCAATTGGAACCAGTC
1	9	1.59242	1.10466	0.628528	1.59822	0.93011	2.71621	0.034771	0.751385	0.730934	1.62383			1.22927	1.03538	0.671338		GCAAATGGCATTCTGACATCCAAAATGGAGAAAAAAATCACTGGATATACCACCGTTGATATATCCCAATGGCATCGTAAAGAACATTTTGAGGCATTTCAGTCAGTTGCTCAATGTACCTATAACCAGACCGTTCAGCTGATATCAACCAGTAACGTTATACGATGTCGCAGAGTATGCCGGTGTCTCTTATCAGACCGTTTCCCGCGTGGTGAACCAGGCCAGCCACGTTTCTGCGAAAACGCGGGAAAAAGTGGAAGCGGCGGCTTGTCAATTGGAACCAGTC
2	1	0.651374	1.09562	1.83109	1.67723	1.28943	3.68705	0.0166296	1.12144	1.18111	2.57861			1.46406	1.62705	0.810153		GCAAATGGCATTCTGACATCCATTCGCAAGATGTGGCGTGTTACGGTGAAAACCTGGCCTATTTCCCTAAAGGGTTTATTGAGAATATGTTTTTCGTCTCAGCCAATCCCTGGGTGAGTTTCACCAGTTTTGATTTAAACGCTGATGGGAAAGACGGTGAGCTGGTGATATGGGATAGTGTTCACCCTTGTTACACCGTTTTCCATGAGCAAACTGAAACGTTTTCATCGCTCTGGAGTGAATACCACGACGATTTCCGGCAGTTTCTGCTTGTCAATTGGAACCAGTC
2	2	1.85704	4.74846	1.29497	5.22426	3.7225	5.61445	0.0665185	5.12821	6.34202	14.153			3.21831	8.54108	0.1935		GCAAATGGCATTCTGACATCCATTCGCAAGATGTGGCGTGTTACGGTGAAAACCTGGCCTATTTCCCTAAAGGGTTTATTGAGAATATGTTTTTCGTCTCAGCCAATCCCTGGGTGAGTTTCACCAGTTTTGATTTAAACGCTGATGCTGATTATGGACAACTTCTTCGCCCCCGTTTTCACCATGGGCAAATATTATACGCAAGGCGACAAGGTGCTGATGCCGCTGGCGATTCAGGTTCATCATGCCGTCTGTGATGGCTTCCATGTCGGCTTGTCAATTGGAACCAGTC
2	3	0.0172238	0.0384033	0.00296196	0.0329191	0.0450186	0.239141	0	0.00187846	0.00968125	0.0366154			0.0536668	0.0160584	0.295216		GCAAATGGCATTCTGACATCCATTCGCAAGATGTGGCGTGTTACGGTGAAAACCTGGCCTATTTCCCTAAAGGGTTTATTGAGAATATGTTTTTCGTCTCAGCCAATCCCTGGGTGAGTTTCACCAGTTTTGATTTAAACGCTGATACGTCTGGCTACATTGTATTGGCATGTAAAAAATAAGCGGGCTTTGCTCGACGCCTTAGCCATTGAGATGTTAGATAGGCACCATACTCACTTTTGCCCTTTAGAAGGGGAAAGCTGGCAAGATTTTGCTTGTCAATTGGAACCAGTC
2	4	0.00313161	0.00903608	0.000592392	0.00329191	0.0144555	0.0428311	0	0	0.00322708	0.00301266			0.0104769	0.00207991	0.196395		GCAAATGGCATTCTGACATCCATTCGCAAGATGTGGCGTGTTACGGTGAAAACCTGGCCTATTTCCCTAAAGGGTTTATTGAGAATATGTTTTTCGTCTCAGCCAATCCCTGGGTGAGTTTCACCAGTTTTGATTTAAACGCTGATAGCTTTGGCTTTTTATGCCAACAAGGTTTTTCACTAGAGAATGCATTATATGCACTCAGCGCTGTGGGGCATTTTACTTTAGGTTGCGTATTGGAAGATCAAGAGCATCAAGTCGCTAAAGAAGAAAGCTTGTCAATTGGAACCAGTC
2	5	1.36538	1.13403	0.203191	0.783475	0.624479	1.87029	0.0438417	0.309946	0.718832	0.84818			0.860669	0.625653	0.446609		GCAAATGGCATTCTGACATCCATTCGCAAGATGTGGCGTGTTACGGTGAAAACCTGGCCTATTTCCCTAAAGGGTTTATTGAGAATATGTTTTTCGTCTCAGCCAATCCCTGGGTGAGTTTCACCAGTTTTGATTTAAACGCTGATGATCTCATGGCCAAGTTGACCAGTGCCGTTCCGGTGCTCACCGCGCGCGACGTCGCCGGAGCGGTCGAGTTCTGGACCGACCGGCTCGGGTTCTCCCGGGACTTCGTGGAGGACGACTTCGCCGGCTTGTCAATTGGAACCAGTC
2	6	0.544899	0.429214	0.0669404	0.283104	0.197834	1.04222	0.00907071	0.0181585	0.190398	0.184004			0.367612	0.130853	0.142241		GCAAATGGCATTCTGACATCCATTCGCAAGATGTGGCGTGTTACGGTGAAAACCTGGCCTATTTCCCTAAAGGGTTTATTGAGAATATGTTTTTCGTCTCAGCCAATCCCTGGGTGAGTTTCACCAGTTTTGATTTAAACGCTGATAGCTTGAGGTCGTGTCCACGAACTTCCGGGACGCCTCCGGGCCGGCCATGACCGAGATCGGCGAGCAGCCGTGGGGGCGGGAGTTCGCCCTGCGCGACCCGGCCGGCAACTGCGTGCACTTCGTGCTTGTCAATTGGAACCAGTC
2	7	0.693651	0.754512	0.135065	0.404905	0.368822	1.33847	0.077101	0.0613631	0.499794	0.231743			0.538933	0.2643	0.226213		GCAAATGGCATTCTGACATCCATTCGCAAGATGTGGCGTGTTACGGTGAAAACCTGGCCTATTTCCCTAAAGGGTTTATTGAGAATATGTTTTTCGTCTCAGCCAATCCCTGGGTGAGTTTCACCAGTTTTGATTTAAACGCTGATCTAGCAGCATGAGAATCCACGTGACCGAGGGCGCCCCCCTGCCCTTCGCCTTCGACATCCTGGCCCCCTGCTGCGAGTACGGCAGCAGGACCTTCGTGCACCACACCGCCGAGATCCCCGACTTGCTTGTCAATTGGAACCAGTC
2	8	1.29179	0.94427	0.715018	0.742326	0.583177	1.55263	0.00755892	0.189099	0.732951	1.51259			0.833824	0.811546	0.96175		GCAAATGGCATTCTGACATCCATTCGCAAGATGTGGCGTGTTACGGTGAAAACCTGGCCTATTTCCCTAAAGGGTTTATTGAGAATATGTTTTTCGTCTCAGCCAATCCCTGGGTGAGTTTCACCAGTTTTGATTTAAACGCTGATATCTGAAGGTGCACGGCACCAACTTCCCCGCCGACGGCCCCGTGATGAAGAACAAGAGCGGCGGCTGGGAGCCCAGCACCGAGGTGGTGTACCCCGAGAACGGCGTGCTGTGCGGCCGGAACGCTTGTCAATTGGAACCAGTC
2	9	1.5799	1.60616	1.69069	1.22459	0.995779	2.63768	0.0317475	0.581071	1.20854	2.01478			1.39522	1.26813	0.815358		GCAAATGGCATTCTGACATCCATTCGCAAGATGTGGCGTGTTACGGTGAAAACCTGGCCTATTTCCCTAAAGGGTTTATTGAGAATATGTTTTTCGTCTCAGCCAATCCCTGGGTGAGTTTCACCAGTTTTGATTTAAACGCTGATATCAACCAGTAACGTTATACGATGTCGCAGAGTATGCCGGTGTCTCTTATCAGACCGTTTCCCGCGTGGTGAACCAGGCCAGCCACGTTTCTGCGAAAACGCGGGAAAAAGTGGAAGCGGCGGCTTGTCAATTGGAACCAGTC
3	1	0.0548031	0.0835837	0.0527229	0.22385	0.154468	0.785238	0	0.0181585	0.072206	0.187249			0.193524	0.0925377	0.401903		GCAAATGGCATTCTGACATCCTGATATGTCTAGATTAGATAAAAGTAAAGTGATTAACAGCGCATTAGAGCTGCTTAATGAGGTCGGAATCGAAGGTTTAACAACCCGTAAACTCGCCCAGAAGCTAGGTGTAGAGCAGCCTGCAGGGAAAGACGGTGAGCTGGTGATATGGGATAGTGTTCACCCTTGTTACACCGTTTTCCATGAGCAAACTGAAACGTTTTCATCGCTCTGGAGTGAATACCACGACGATTTCCGGCAGTTTCTGCTTGTCAATTGGAACCAGTC
3	2	0.0892508	0.0926198	0.0373207	0.115217	0.135056	0.546097	0.00453535	0.0106446	0.0718026	0.104284			0.145728	0.0622439	0.294755		GCAAATGGCATTCTGACATCCTGATATGTCTAGATTAGATAAAAGTAAAGTGATTAACAGCGCATTAGAGCTGCTTAATGAGGTCGGAATCGAAGGTTTAACAACCCGTAAACTCGCCCAGAAGCTAGGTGTAGAGCAGCCTGCAGCTGATTATGGACAACTTCTTCGCCCCCGTTTTCACCATGGGCAAATATTATACGCAAGGCGACAAGGTGCTGATGCCGCTGGCGATTCAGGTTCATCATGCCGTCTGTGATGGCTTCCATGTCGGCTTGTCAATTGGAACCAGTC
3	3	0.023487	0.0180722	0.00533153	0.074068	0.0879722	0.303387	0	0.00500924	0.0100846	0.0885259			0.0731883	0.0345399	0.45021		GCAAATGGCATTCTGACATCCTGATATGTCTAGATTAGATAAAAGTAAAGTGATTAACAGCGCATTAGAGCTGCTTAATGAGGTCGGAATCGAAGGTTTAACAACCCGTAAACTCGCCCAGAAGCTAGGTGTAGAGCAGCCTACGTCTGGCTACATTGTATTGGCATGTAAAAAATAAGCGGGCTTTGCTCGACGCCTTAGCCATTGAGATGTTAGATAGGCACCATACTCACTTTTGCCCTTTAGAAGGGGAAAGCTGGCAAGATTTTGCTTGTCAATTGGAACCAGTC
3	4	0.0109606	0.00225902	0.000592392	0.00329191	0.0119774	0.0178463	0	0	0.000403385	0.00231743			0.00670395	0.000906939	0.0695742		GCAAATGGCATTCTGACATCCTGATATGTCTAGATTAGATAAAAGTAAAGTGATTAACAGCGCATTAGAGCTGCTTAATGAGGTCGGAATCGAAGGTTTAACAACCCGTAAACTCGCCCAGAAGCTAGGTGTAGAGCAGCCTGCTTTGGCTTTTTATGCCAACAAGGTTTTTCACTAGAGAATGCATTATATGCACTCAGCGCTGTGGGGCATTTTACTTTAGGTTGCGTATTGGAAGATCAAGAGCATCAAGTCGCTAAAGAAGAAAGCTTGTCAATTGGAACCAGTC
3	5	0.228607	0.0926198	0.0189566	0.13003	0.0863201	0.271264	0.00755892	0.0068877	0.0201693	0.0266505			0.119337	0.0179025	0.035778	C	GCAAATGGCATTCTGACATCCTGATATGTCTAGATTAGATAAAAGTAAAGTGATTAACAGCGCATTAGAGCTGCTTAATGAGGTCGGAATCGAAGGTTTAACAACCCGTAAACTCGCCCAGAAGCTAGGTGTAGAGCAGCCTGCTCATGGCCAAGTTGACCAGTGCCGTTCCGGTGCTCACCGCGCGCGACGTCGCCGGAGCGGTCGAGTTCTGGACCGACCGGCTCGGGTTCTCCCGGGACTTCGTGGAGGACGACTTCGCCGGCTTGTCAATTGGAACCAGTC
3	6	0.0375793	0.0158131	0.00710871	0.0345651	0.0218898	0.249848	0.00151178	0.000626154	0.00927786	0.0125141			0.0526166	0.00747272	0.22468		GCAAATGGCATTCTGACATCCTGATATGTCTAGATTAGATAAAAGTAAAGTGATTAACAGCGCATTAGAGCTGCTTAATGAGGTCGGAATCGAAGGTTTAACAACCCGTAAACTCGCCCAGAAGCTAGGTGTAGAGCAGCCTGCAAGCTTGAGGTCGTGTCCACGAACTTCCGGGACGCCTCCGGGCCGGCCATGACCGAGATCGGCGAGCAGCCGTGGGGGCGGGAGTTCGCCCTGCGCGACCCGGCCGGCAACTGCGTGCACTTCGTGCTTGTCAATTGGAACCAGTC
3	7	0.0579347	0.0406623	0.0118478	0.037857	0.0379974	0.207017	0.00302357	0	0.0197659	0.0122824			0.05662	0.0106828	0.131409		GCAAATGGCATTCTGACATCCTGATATGTCTAGATTAGATAAAAGTAAAGTGATTAACAGCGCATTAGAGCTGCTTAATGAGGTCGGAATCGAAGGTTTAACAACCCGTAAACTCGCCCAGAAGCTAGGTGTAGAGCAGCCTGCACTAGCAGCATGAGAATCCACGTGACCGAGGGCGCCCCCCTGCCCTTCGCCTTCGACATCCTGGCCCCCTGCTGCGAGTACGGCAGCAGGACCTTCGTGCACCACACCGCCGAGATCCCCGACTTGCTTGTCAATTGGAACCAGTC
3	8	0.0845534	0.0451804	0.0148098	0.0790058	0.0693865	0.235571	0	0.00375693	0.022993	0.0463487			0.075501	0.0243662	0.148313		GCAAATGGCATTCTGACATCCTGATATGTCTAGATTAGATAAAAGTAAAGTGATTAACAGCGCATTAGAGCTGCTTAATGAGGTCGGAATCGAAGGTTTAACAACCCGTAAACTCGCCCAGAAGCTAGGTGTAGAGCAGCCTGCAATCTGAAGGTGCACGGCACCAACTTCCCCGCCGACGGCCCCGTGATGAAGAACAAGAGCGGCGGCTGGGAGCCCAGCACCGAGGTGGTGTACCCCGAGAACGGCGTGCTGTGCGGCCGGAACGCTTGTCAATTGGAACCAGTC
3	9	0.133093	0.0835837	0.0201413	0.120155	0.0677344	0.410465	0.00302357	0.00751385	0.0459859	0.0739261			0.119742	0.0424753	0.202077		GCAAATGGCATTCTGACATCCTGATATGTCTAGATTAGATAAAAGTAAAGTGATTAACAGCGCATTAGAGCTGCTTAATGAGGTCGGAATCGAAGGTTTAACAACCCGTAAACTCGCCCAGAAGCTAGGTGTAGAGCAGCCTGCAATCAACCAGTAACGTTATACGATGTCGCAGAGTATGCCGGTGTCTCTTATCAGACCGTTTCCCGCGTGGTGAACCAGGCCAGCCACGTTTCTGCGAAAACGCGGGAAAAAGTGGAAGCGGCGGCTTGTCAATTGGAACCAGTC
4	1	0.0767243	0.149095	0.0260653	0.16295	0.130926	1.0565	0	0.0194108	0.108511	0.133021			0.228895	0.0869807	0.358995		GCAAATGGCATTCTGACATCCTTACGTAATAACGCTAAAAGTTTTAGATGTGCTTTACTAAGTCATCGCGATGGAGCAAAAGTACATTTAGGTACACGGCCTACAGAAAAACAGTATGAAACTCTCGAAAATCAATTAGCCCATAGCTGGGAAAGACGGTGAGCTGGTGATATGGGATAGTGTTCACCCTTGTTACACCGTTTTCCATGAGCAAACTGAAACGTTTTCATCGCTCTGGAGTGAATACCACGACGATTTCCGGCAGTTTCTGCTTGTCAATTGGAACCAGTC
4	2	0.115869	0.264305	0.0367283	0.164596	0.151163	0.8709	0	0.0300554	0.187978	0.130471			0.22908	0.116168	0.379659		GCAAATGGCATTCTGACATCCTTACGTAATAACGCTAAAAGTTTTAGATGTGCTTTACTAAGTCATCGCGATGGAGCAAAAGTACATTTAGGTACACGGCCTACAGAAAAACAGTATGAAACTCTCGAAAATCAATTAGCCCATAGCTGCTGATTATGGACAACTTCTTCGCCCCCGTTTTCACCATGGGCAAATATTATACGCAAGGCGACAAGGTGCTGATGCCGCTGGCGATTCAGGTTCATCATGCCGTCTGTGATGGCTTCCATGTCGGCTTGTCAATTGGAACCAGTC
4	3	0.0328819	0.0519574	0.00414675	0.102049	0.128861	0.424742	0	0.00751385	0.0447758	0.181687			0.106377	0.0779921	0.724793		GCAAATGGCATTCTGACATCCTTACGTAATAACGCTAAAAGTTTTAGATGTGCTTTACTAAGTCATCGCGATGGAGCAAAAGTACATTTAGGTACACGGCCTACAGAAAAACAGTATGAAACTCTCGAAAATCAATTAGCCCATAGCTCTGGCTACATTGTATTGGCATGTAAAAAATAAGCGGGCTTTGCTCGACGCCTTAGCCATTGAGATGTTAGATAGGCACCATACTCACTTTTGCCCTTTAGAAGGGGAAAGCTGGCAAGATTTTGCTTGTCAATTGGAACCAGTC
4	4	0.0782901	0.0429214	0.00296196	0.0510246	0.431188	0.421173	0	0.00187846	0.0605078	0.383303			0.146794	0.148563	0.990527		GCAAATGGCATTCTGACATCCTTACGTAATAACGCTAAAAGTTTTAGATGTGCTTTACTAAGTCATCGCGATGGAGCAAAAGTACATTTAGGTACACGGCCTACAGAAAAACAGTATGAAACTCTCGAAAATCAATTAGCCCATAGCTTTGGCTTTTTATGCCAACAAGGTTTTTCACTAGAGAATGCATTATATGCACTCAGCGCTGTGGGGCATTTTACTTTAGGTTGCGTATTGGAAGATCAAGAGCATCAAGTCGCTAAAGAAGAAAGCTTGTCAATTGGAACCAGTC
4	5	0.372661	0.295932	0.0420599	0.199161	0.196595	0.856623	0.0196532	0.0482139	0.196852	0.193506			0.283241	0.146191	0.278097		GCAAATGGCATTCTGACATCCTTACGTAATAACGCTAAAAGTTTTAGATGTGCTTTACTAAGTCATCGCGATGGAGCAAAAGTACATTTAGGTACACGGCCTACAGAAAAACAGTATGAAACTCTCGAAAATCAATTAGCCCATAGCTCATGGCCAAGTTGACCAGTGCCGTTCCGGTGCTCACCGCGCGCGACGTCGCCGGAGCGGTCGAGTTCTGGACCGACCGGCTCGGGTTCTCCCGGGACTTCGTGGAGGACGACTTCGCCGGCTTGTCAATTGGAACCAGTC
4	6	0.0735927	0.0564755	0.0100707	0.0559625	0.0359323	0.367634	0.00151178	0.00438308	0.0294471	0.0152951			0.0858828	0.0163751	0.199896		GCAAATGGCATTCTGACATCCTTACGTAATAACGCTAAAAGTTTTAGATGTGCTTTACTAAGTCATCGCGATGGAGCAAAAGTACATTTAGGTACACGGCCTACAGAAAAACAGTATGAAACTCTCGAAAATCAATTAGCCCATAGCTAGCTTGAGGTCGTGTCCACGAACTTCCGGGACGCCTCCGGGCCGGCCATGACCGAGATCGGCGAGCAGCCGTGGGGGCGGGAGTTCGCCCTGCGCGACCCGGCCGGCAACTGCGTGCACTTCGTGCTTGTCAATTGGAACCAGTC
4	7	0.0939482	0.0881017	0.0201413	0.0576084	0.0483227	0.342649	0.00302357	0.00187846	0.0488096	0.0236378			0.0933993	0.0247753	0.174568		GCAAATGGCATTCTGACATCCTTACGTAATAACGCTAAAAGTTTTAGATGTGCTTTACTAAGTCATCGCGATGGAGCAAAAGTACATTTAGGTACACGGCCTACAGAAAAACAGTATGAAACTCTCGAAAATCAATTAGCCCATAGCTCTAGCAGCATGAGAATCCACGTGACCGAGGGCGCCCCCCTGCCCTTCGCCTTCGACATCCTGGCCCCCTGCTGCGAGTACGGCAGCAGGACCTTCGTGCACCACACCGCCGAGATCCCCGACTTGCTTGTCAATTGGAACCAGTC
4	8	0.178502	0.117469	0.0231033	0.0839437	0.0644303	0.421173	0	0.00939232	0.0883414	0.0811101			0.126946	0.0596146	0.291338		GCAAATGGCATTCTGACATCCTTACGTAATAACGCTAAAAGTTTTAGATGTGCTTTACTAAGTCATCGCGATGGAGCAAAAGTACATTTAGGTACACGGCCTACAGAAAAACAGTATGAAACTCTCGAAAATCAATTAGCCCATAGCTATCTGAAGGTGCACGGCACCAACTTCCCCGCCGACGGCCCCGTGATGAAGAACAAGAGCGGCGGCTGGGAGCCCAGCACCGAGGTGGTGTACCCCGAGAACGGCGTGCTGTGCGGCCGGAACGCTTGTCAATTGGAACCAGTC
4	9	0.270884	0.277859	0.0539077	0.14649	0.125557	0.803084	0.00907071	0.0319339	0.158127	0.137192			0.240979	0.109084	0.260838		GCAAATGGCATTCTGACATCCTTACGTAATAACGCTAAAAGTTTTAGATGTGCTTTACTAAGTCATCGCGATGGAGCAAAAGTACATTTAGGTACACGGCCTACAGAAAAACAGTATGAAACTCTCGAAAATCAATTAGCCCATAGCTATCAACCAGTAACGTTATACGATGTCGCAGAGTATGCCGGTGTCTCTTATCAGACCGTTTCCCGCGTGGTGAACCAGGCCAGCCACGTTTCTGCGAAAACGCGGGAAAAAGTGGAAGCGGCGGCTTGTCAATTGGAACCAGTC
5	1	0.151883	0.201053	0.0420599	0.334129	0.257721	0.767391	0.0241885	0.0288031	0.0891481	0.163611			0.254061	0.093854	0.160409		GCAAATGGCATTCTGACATCCGGGAAACACCTACTACTGATAGTATGCCGCCATTATTACGACAAGCTATCGAATTATTTGATCACCAAGGTGCAGAGCCAGCCTTCTTATTCGGCCTTGAATTGATCATATGCGGATTAACTAGGGGAAAGACGGTGAGCTGGTGATATGGGATAGTGTTCACCCTTGTTACACCGTTTTCCATGAGCAAACTGAAACGTTTTCATCGCTCTGGAGTGAATACCACGACGATTTCCGGCAGTTTCTGCTTGTCAATTGGAACCAGTC
5	2	0.386753	0.607676	0.0995219	0.480619	0.538984	1.24567	0.0665185	0.0626154	0.335616	0.254918			0.489392	0.217717	0.147526		GCAAATGGCATTCTGACATCCGGGAAACACCTACTACTGATAGTATGCCGCCATTATTACGACAAGCTATCGAATTATTTGATCACCAAGGTGCAGAGCCAGCCTTCTTATTCGGCCTTGAATTGATCATATGCGGATTAACTAGGCTGATTATGGACAACTTCTTCGCCCCCGTTTTCACCATGGGCAAATATTATACGCAAGGCGACAAGGTGCTGATGCCGCTGGCGATTCAGGTTCATCATGCCGTCTGTGATGGCTTCCATGTCGGCTTGTCAATTGGAACCAGTC
5	3	0.0187896	0.0225902	0.00414675	0.0279812	0.0169336	0.0856623	0	0	0.0116982	0.0393964			0.0251577	0.0170315	0.62866		GCAAATGGCATTCTGACATCCGGGAAACACCTACTACTGATAGTATGCCGCCATTATTACGACAAGCTATCGAATTATTTGATCACCAAGGTGCAGAGCCAGCCTTCTTATTCGGCCTTGAATTGATCATATGCGGATTAACTGGCTACATTGTATTGGCATGTAAAAAATAAGCGGGCTTTGCTCGACGCCTTAGCCATTGAGATGTTAGATAGGCACCATACTCACTTTTGCCCTTTAGAAGGGGAAAGCTGGCAAGATTTTGCTTGTCAATTGGAACCAGTC
5	4	0	0	0	0	0.00206507	0	0	0	0.000403385	0.000463487			0.000295011	0.000288957	0.985775		GCAAATGGCATTCTGACATCCGGGAAACACCTACTACTGATAGTATGCCGCCATTATTACGACAAGCTATCGAATTATTTGATCACCAAGGTGCAGAGCCAGCCTTCTTATTCGGCCTTGAATTGATCATATGCGGATTAACTAGAGCTTTGGCTTTTTATGCCAACAAGGTTTTTCACTAGAGAATGCATTATATGCACTCAGCGCTGTGGGGCATTTTACTTTAGGTTGCGTATTGGAAGATCAAGAGCATCAAGTCGCTAAAGAAGAAAGCTTGTCAATTGGAACCAGTC
5	5	0.953574	0.442768	0.0752338	0.278166	0.385756	0.67816	0.0891953	0.0388216	0.196449	0.238232			0.414693	0.157834	0.0923036		GCAAATGGCATTCTGACATCCGGGAAACACCTACTACTGATAGTATGCCGCCATTATTACGACAAGCTATCGAATTATTTGATCACCAAGGTGCAGAGCCAGCCTTCTTATTCGGCCTTGAATTGATCATATGCGGATTAACTAGATCTCATGGCCAAGTTGACCAGTGCCGTTCCGGTGCTCACCGCGCGCGACGTCGCCGGAGCGGTCGAGTTCTGGACCGACCGGCTCGGGTTCTCCCGGGACTTCGTGGAGGACGACTTCGCCGGCTTGTCAATTGGAACCAGTC
5	6	0.840836	0.420178	0.127364	0.342359	0.359323	0.956562	0.0695421	0.0269246	0.144009	0.14623			0.445166	0.105721	0.0380125	AG	GCAAATGGCATTCTGACATCCGGGAAACACCTACTACTGATAGTATGCCGCCATTATTACGACAAGCTATCGAATTATTTGATCACCAAGGTGCAGAGCCAGCCTTCTTATTCGGCCTTGAATTGATCATATGCGGATTAACTAGCTTGAGGTCGTGTCCACGAACTTCCGGGACGCCTCCGGGCCGGCCATGACCGAGATCGGCGAGCAGCCGTGGGGGCGGGAGTTCGCCCTGCGCGACCCGGCCGGCAACTGCGTGCACTTCGTGCTTGTCAATTGGAACCAGTC
5	7	12.0066	8.92313	39.5084	14.4811	10.878	10.2581	8.44029	19.3106	12.2464	11.1693			14.9279	14.2421	0.891871		GCAAATGGCATTCTGACATCCGGGAAACACCTACTACTGATAGTATGCCGCCATTATTACGACAAGCTATCGAATTATTTGATCACCAAGGTGCAGAGCCAGCCTTCTTATTCGGCCTTGAATTGATCATATGCGGATTAACTAGCAGCATGAGAATCCACGTGACCGAGGGCGCCCCCCTGCCCTTCGCCTTCGACATCCTGGCCCCCTGCTGCGAGTACGGCAGCAGGACCTTCGTGCACCACACCGCCGAGATCCCCGACTTGCTTGTCAATTGGAACCAGTC
5	8	0.590308	0.341112	0.0853045	0.278166	0.155707	0.453296	0.0136061	0.0118969	0.139168	0.178906			0.273928	0.10999	0.115265		GCAAATGGCATTCTGACATCCGGGAAACACCTACTACTGATAGTATGCCGCCATTATTACGACAAGCTATCGAATTATTTGATCACCAAGGTGCAGAGCCAGCCTTCTTATTCGGCCTTGAATTGATCATATGCGGATTAACTAGATCTGAAGGTGCACGGCACCAACTTCCCCGCCGACGGCCCCGTGATGAAGAACAAGAGCGGCGGCTGGGAGCCCAGCACCGAGGTGGTGTACCCCGAGAACGGCGTGCTGTGCGGCCGGAACGCTTGTCAATTGGAACCAGTC
5	9	0.63415	0.454063	0.0829349	0.376924	0.316369	0.778099	0.0755892	0.0482139	0.233963	0.201848			0.388304	0.161342	0.0828599		GCAAATGGCATTCTGACATCCGGGAAACACCTACTACTGATAGTATGCCGCCATTATTACGACAAGCTATCGAATTATTTGATCACCAAGGTGCAGAGCCAGCCTTCTTATTCGGCCTTGAATTGATCATATGCGGATTAACTAGATCAACCAGTAACGTTATACGATGTCGCAGAGTATGCCGGTGTCTCTTATCAGACCGTTTCCCGCGTGGTGAACCAGGCCAGCCACGTTTCTGCGAAAACGCGGGAAAAAGTGGAAGCGGCGGCTTGTCAATTGGAACCAGTC
6	1	1.10702	0.657375	0.171201	0.641922	0.768208	0.988685	1.97893	0.145268	0.381199	0.179369			0.901906	0.235279	0.0200906	-	GCAAATGGCATTCTGACATCCGTGTGGTCCGGGACGACGTGACCCTGTTCATCAGCGCGGTCCAGGACCAGGTGGTGCCGGACAACACCCTGGCCTGGGTGTGGGTGCGCGGCCTGGACGAGCTGTACGCCGAGTGGTCGAAGCTGGGAAAGACGGTGAGCTGGTGATATGGGATAGTGTTCACCCTTGTTACACCGTTTTCCATGAGCAAACTGAAACGTTTTCATCGCTCTGGAGTGAATACCACGACGATTTCCGGCAGTTTCTGCTTGTCAATTGGAACCAGTC
6	2	1.89775	2.12348	0.370245	0.712699	1.53022	0.949424	4.49453	0.380702	1.27994	0.267432			1.72548	0.642692	0.114316		GCAAATGGCATTCTGACATCCGTGTGGTCCGGGACGACGTGACCCTGTTCATCAGCGCGGTCCAGGACCAGGTGGTGCCGGACAACACCCTGGCCTGGGTGTGGGTGCGCGGCCTGGACGAGCTGTACGCCGAGTGGTCGAAGCTGCTGATTATGGACAACTTCTTCGCCCCCGTTTTCACCATGGGCAAATATTATACGCAAGGCGACAAGGTGCTGATGCCGCTGGCGATTCAGGTTCATCATGCCGTCTGTGATGGCTTCCATGTCGGCTTGTCAATTGGAACCAGTC
6	3	0.0767243	0.0225902	0.0100707	0.0395029	0.0326282	0.14277	0.00453535	0	0.0125049	0.0127459			0.0469746	0.00841694	0.0817301		GCAAATGGCATTCTGACATCCGTGTGGTCCGGGACGACGTGACCCTGTTCATCAGCGCGGTCCAGGACCAGGTGGTGCCGGACAACACCCTGGCCTGGGTGTGGGTGCGCGGCCTGGACGAGCTGTACGCCGAGTGGTCGAAGCTACGTCTGGCTACATTGTATTGGCATGTAAAAAATAAGCGGGCTTTGCTCGACGCCTTAGCCATTGAGATGTTAGATAGGCACCATACTCACTTTTGCCCTTTAGAAGGGGAAAGCTGGCAAGATTTTGCTTGTCAATTGGAACCAGTC
6	4	0.0140922	0.00225902	0.00177718	0	0.0028911	0.0107078	0	0	0.00161354	0.000231743			0.00453247	0.000615095	0.115494		GCAAATGGCATTCTGACATCCGTGTGGTCCGGGACGACGTGACCCTGTTCATCAGCGCGGTCCAGGACCAGGTGGTGCCGGACAACACCCTGGCCTGGGTGTGGGTGCGCGGCCTGGACGAGCTGTACGCCGAGTGGTCGAAGCTAGCTTTGGCTTTTTATGCCAACAAGGTTTTTCACTAGAGAATGCATTATATGCACTCAGCGCTGTGGGGCATTTTACTTTAGGTTGCGTATTGGAAGATCAAGAGCATCAAGTCGCTAAAGAAGAAAGCTTGTCAATTGGAACCAGTC
6	5	1.40922	1.69878	1.77007	0.574438	1.30471	0.606774	0.875323	0.308694	0.781357	0.231048			1.17705	0.440366	0.0250259	GAT	GCAAATGGCATTCTGACATCCGTGTGGTCCGGGACGACGTGACCCTGTTCATCAGCGCGGTCCAGGACCAGGTGGTGCCGGACAACACCCTGGCCTGGGTGTGGGTGCGCGGCCTGGACGAGCTGTACGCCGAGTGGTCGAAGATCTCATGGCCAAGTTGACCAGTGCCGTTCCGGTGCTCACCGCGCGCGACGTCGCCGGAGCGGTCGAGTTCTGGACCGACCGGCTCGGGTTCTCCCGGGACTTCGTGGAGGACGACTTCGCCGGCTTGTCAATTGGAACCAGTC
6	6	25.3222	32.3469	38.6844	34.0779	39.877	14.1628	56.2217	44.8696	41.1074	22.7892			34.3847	36.2554	0.834365		GCAAATGGCATTCTGACATCCGTGTGGTCCGGGACGACGTGACCCTGTTCATCAGCGCGGTCCAGGACCAGGTGGTGCCGGACAACACCCTGGCCTGGGTGTGGGTGCGCGGCCTGGACGAGCTGTACGCCGAGTGGTCGAAGCTTGAGGTCGTGTCCACGAACTTCCGGGACGCCTCCGGGCCGGCCATGACCGAGATCGGCGAGCAGCCGTGGGGGCGGGAGTTCGCCCTGCGCGACCCGGCCGGCAACTGCGTGCACTTCGTGCTTGTCAATTGGAACCAGTC
6	7	1.47812	1.59035	0.472137	0.411489	2.00395	0.688867	3.94878	0.158417	0.711572	0.0792562			1.51338	0.316415	0.0475865	CT	GCAAATGGCATTCTGACATCCGTGTGGTCCGGGACGACGTGACCCTGTTCATCAGCGCGGTCCAGGACCAGGTGGTGCCGGACAACACCCTGGCCTGGGTGTGGGTGCGCGGCCTGGACGAGCTGTACGCCGAGTGGTCGAAGCTAGCAGCATGAGAATCCACGTGACCGAGGGCGCCCCCCTGCCCTTCGCCTTCGACATCCTGGCCCCCTGCTGCGAGTACGGCAGCAGGACCTTCGTGCACCACACCGCCGAGATCCCCGACTTGCTTGTCAATTGGAACCAGTC
6	8	1.4562	1.15662	0.263615	0.632047	0.475793	0.535389	0.323522	0.0676247	0.718026	0.275543			0.691883	0.353731	0.240228		GCAAATGGCATTCTGACATCCGTGTGGTCCGGGACGACGTGACCCTGTTCATCAGCGCGGTCCAGGACCAGGTGGTGCCGGACAACACCCTGGCCTGGGTGTGGGTGCGCGGCCTGGACGAGCTGTACGCCGAGTGGTCGAAGCTATCTGAAGGTGCACGGCACCAACTTCCCCGCCGACGGCCCCGTGATGAAGAACAAGAGCGGCGGCTGGGAGCCCAGCACCGAGGTGGTGTACCCCGAGAACGGCGTGCTGTGCGGCCGGAACGCTTGTCAATTGGAACCAGTC
6	9	1.47029	1.43674	0.297381	0.651798	0.956543	0.785238	1.80961	0.207883	0.887447	0.222937			1.05823	0.439423	0.0913299		GCAAATGGCATTCTGACATCCGTGTGGTCCGGGACGACGTGACCCTGTTCATCAGCGCGGTCCAGGACCAGGTGGTGCCGGACAACACCCTGGCCTGGGTGTGGGTGCGCGGCCTGGACGAGCTGTACGCCGAGTGGTCGAAGCTATCAACCAGTAACGTTATACGATGTCGCAGAGTATGCCGGTGTCTCTTATCAGACCGTTTCCCGCGTGGTGAACCAGGCCAGCCACGTTTCTGCGAAAACGCGGGAAAAAGTGGAAGCGGCGGCTTGTCAATTGGAACCAGTC
7	1	1.90871	1.00752	0.626751	0.872356	1.25598	1.44555	0.91463	0.577941	0.973369	0.568466			1.14736	0.706592	0.073215		GCAAATGGCATTCTGACATCCTGGTGAGCGGCCTGCTGAAGGAGAGTATGCGCATCAAGATGTACATGGAGGGCACCGTGAACGGCCACTACTTCAAGTGCGAGGGCGAGGGCGACGGCAACCCCTTCGCCGGCACCCAGCCATAACTGGGAAAGACGGTGAGCTGGTGATATGGGATAGTGTTCACCCTTGTTACACCGTTTTCCATGAGCAAACTGAAACGTTTTCATCGCTCTGGAGTGAATACCACGACGATTTCCGGCAGTTTCTGCTTGTCAATTGGAACCAGTC
7	2	2.08408	2.3426	0.636822	0.892108	2.03369	1.17786	2.08324	0.827776	1.82249	0.411576			1.6072	1.02062	0.305072		GCAAATGGCATTCTGACATCCTGGTGAGCGGCCTGCTGAAGGAGAGTATGCGCATCAAGATGTACATGGAGGGCACCGTGAACGGCCACTACTTCAAGTGCGAGGGCGAGGGCGACGGCAACCCCTTCGCCGGCACCCAGCCATAACTGCTGATTATGGACAACTTCTTCGCCCCCGTTTTCACCATGGGCAAATATTATACGCAAGGCGACAAGGTGCTGATGCCGCTGGCGATTCAGGTTCATCATGCCGTCTGTGATGGCTTCCATGTCGGCTTGTCAATTGGAACCAGTC
7	3	0.662335	0.273341	0.308636	0.357172	0.403929	0.817361	0.0181414	0.142137	0.328759	0.85351			0.405845	0.441469	0.889374		GCAAATGGCATTCTGACATCCTGGTGAGCGGCCTGCTGAAGGAGAGTATGCGCATCAAGATGTACATGGAGGGCACCGTGAACGGCCACTACTTCAAGTGCGAGGGCGAGGGCGACGGCAACCCCTTCGCCGGCACCCAGCCATAACTCTGGCTACATTGTATTGGCATGTAAAAAATAAGCGGGCTTTGCTCGACGCCTTAGCCATTGAGATGTTAGATAGGCACCATACTCACTTTTGCCCTTTAGAAGGGGAAAGCTGGCAAGATTTTGCTTGTCAATTGGAACCAGTC
7	4	0.17537	0.0338853	0.0687175	0.00493787	0.084255	0.107078	0	0	0.0443724	0.0435677			0.0677491	0.0293134	0.202139		GCAAATGGCATTCTGACATCCTGGTGAGCGGCCTGCTGAAGGAGAGTATGCGCATCAAGATGTACATGGAGGGCACCGTGAACGGCCACTACTTCAAGTGCGAGGGCGAGGGCGACGGCAACCCCTTCGCCGGCACCCAGCCATAACTTTGGCTTTTTATGCCAACAAGGTTTTTCACTAGAGAATGCATTATATGCACTCAGCGCTGTGGGGCATTTTACTTTAGGTTGCGTATTGGAAGATCAAGAGCATCAAGTCGCTAAAGAAGAAAGCTTGTCAATTGGAACCAGTC
7	5	0.403977	0.422437	0.063386	0.143198	0.255656	0.189171	0.137572	0.0463354	0.309396	0.0987226			0.230771	0.151485	0.456378		GCAAATGGCATTCTGACATCCTGGTGAGCGGCCTGCTGAAGGAGAGTATGCGCATCAAGATGTACATGGAGGGCACCGTGAACGGCCACTACTTCAAGTGCGAGGGCGAGGGCGACGGCAACCCCTTCGCCGGCACCCAGCCATAACTCATGGCCAAGTTGACCAGTGCCGTTCCGGTGCTCACCGCGCGCGACGTCGCCGGAGCGGTCGAGTTCTGGACCGACCGGCTCGGGTTCTCCCGGGACTTCGTGGAGGACGACTTCGCCGGCTTGTCAATTGGAACCAGTC
7	6	0.416504	0.492466	0.100114	0.169533	0.187096	0.364065	0.134549	0.0169062	0.152076	0.0384694			0.266332	0.0691506	0.0265155	-	GCAAATGGCATTCTGACATCCTGGTGAGCGGCCTGCTGAAGGAGAGTATGCGCATCAAGATGTACATGGAGGGCACCGTGAACGGCCACTACTTCAAGTGCGAGGGCGAGGGCGACGGCAACCCCTTCGCCGGCACCCAGCCATAACTAGCTTGAGGTCGTGTCCACGAACTTCCGGGACGCCTCCGGGCCGGCCATGACCGAGATCGGCGAGCAGCCGTGGGGGCGGGAGTTCGCCCTGCGCGACCCGGCCGGCAACTGCGTGCACTTCGTGCTTGTCAATTGGAACCAGTC
7	7	0.829876	1.24698	0.220962	0.528352	1.08169	0.713852	1.77937	0.248583	1.15207	0.174271			0.91444	0.524974	0.356253		GCAAATGGCATTCTGACATCCTGGTGAGCGGCCTGCTGAAGGAGAGTATGCGCATCAAGATGTACATGGAGGGCACCGTGAACGGCCACTACTTCAAGTGCGAGGGCGAGGGCGACGGCAACCCCTTCGCCGGCACCCAGCCATAACTCTAGCAGCATGAGAATCCACGTGACCGAGGGCGCCCCCCTGCCCTTCGCCTTCGACATCCTGGCCCCCTGCTGCGAGTACGGCAGCAGGACCTTCGTGCACCACACCGCCGAGATCCCCGACTTGCTTGTCAATTGGAACCAGTC
7	8	0.989587	0.774844	0.226886	0.306148	0.243679	0.499697	0.0695421	0.0532231	0.617179	0.253759			0.44434	0.308054	0.542831		GCAAATGGCATTCTGACATCCTGGTGAGCGGCCTGCTGAAGGAGAGTATGCGCATCAAGATGTACATGGAGGGCACCGTGAACGGCCACTACTTCAAGTGCGAGGGCGAGGGCGACGGCAACCCCTTCGCCGGCACCCAGCCATAACTATCTGAAGGTGCACGGCACCAACTTCCCCGCCGACGGCCCCGTGATGAAGAACAAGAGCGGCGGCTGGGAGCCCAGCACCGAGGTGGTGTACCCCGAGAACGGCGTGCTGTGCGGCCGGAACGCTTGTCAATTGGAACCAGTC
7	9	1.41079	1.15662	0.439555	0.495432	0.728558	0.742406	0.541219	0.416393	1.00241	0.313317			0.787797	0.577374	0.458234		GCAAATGGCATTCTGACATCCTGGTGAGCGGCCTGCTGAAGGAGAGTATGCGCATCAAGATGTACATGGAGGGCACCGTGAACGGCCACTACTTCAAGTGCGAGGGCGAGGGCGACGGCAACCCCTTCGCCGGCACCCAGCCATAACTATCAACCAGTAACGTTATACGATGTCGCAGAGTATGCCGGTGTCTCTTATCAGACCGTTTCCCGCGTGGTGAACCAGGCCAGCCACGTTTCTGCGAAAACGCGGGAAAAAGTGGAAGCGGCGGCTTGTCAATTGGAACCAGTC
8	1	1.41079	0.634784	0.491093	0.648506	0.85618	1.39201	0.272121	0.510942	0.678897	0.692681			0.815069	0.627507	0.319323		GCAAATGGCATTCTGACATCCCTTCAAGCAGAGCTTCCCCGAGGGCTTCACCTGGGAGAGAACCACCACCTACGAGGACGGCGGCATCCTGACCGCCCACCAGGACACCAGCCTGGAGGGCAACTGCCTGATCTACAAGGCCAATTCCGGGAAAGACGGTGAGCTGGTGATATGGGATAGTGTTCACCCTTGTTACACCGTTTTCCATGAGCAAACTGAAACGTTTTCATCGCTCTGGAGTGAATACCACGACGATTTCCGGCAGTTTCTGCTTGTCAATTGGAACCAGTC
8	2	1.92594	1.76881	0.49761	0.941486	1.4501	1.3706	0.752869	0.701293	1.34811	0.65537			1.24392	0.901592	0.302845		GCAAATGGCATTCTGACATCCCTTCAAGCAGAGCTTCCCCGAGGGCTTCACCTGGGAGAGAACCACCACCTACGAGGACGGCGGCATCCTGACCGCCCACCAGGACACCAGCCTGGAGGGCAACTGCCTGATCTACAAGGCCAATTCCGCTGATTATGGACAACTTCTTCGCCCCCGTTTTCACCATGGGCAAATATTATACGCAAGGCGACAAGGTGCTGATGCCGCTGGCGATTCAGGTTCATCATGCCGTCTGTGATGGCTTCCATGTCGGCTTGTCAATTGGAACCAGTC
8	3	0.134659	0.0632525	0.0231033	0.0213974	0.0474967	0.0749545	0.00453535	0.00250462	0.0161354	0.0398598			0.0527713	0.0195	0.132599		GCAAATGGCATTCTGACATCCCTTCAAGCAGAGCTTCCCCGAGGGCTTCACCTGGGAGAGAACCACCACCTACGAGGACGGCGGCATCCTGACCGCCCACCAGGACACCAGCCTGGAGGGCAACTGCCTGATCTACAAGGCCAATACGTCTGGCTACATTGTATTGGCATGTAAAAAATAAGCGGGCTTTGCTCGACGCCTTAGCCATTGAGATGTTAGATAGGCACCATACTCACTTTTGCCCTTTAGAAGGGGAAAGCTGGCAAGATTTTGCTTGTCAATTGGAACCAGTC
8	4	0.0485399	0.00677706	0.0124402	0	0.0119774	0.0356926	0	0	0.00443724	0.00278092			0.0164896	0.00240605	0.0930803		GCAAATGGCATTCTGACATCCCTTCAAGCAGAGCTTCCCCGAGGGCTTCACCTGGGAGAGAACCACCACCTACGAGGACGGCGGCATCCTGACCGCCCACCAGGACACCAGCCTGGAGGGCAACTGCCTGATCTACAAGGCCAATTCCTTTGGCTTTTTATGCCAACAAGGTTTTTCACTAGAGAATGCATTATATGCACTCAGCGCTGTGGGGCATTTTACTTTAGGTTGCGTATTGGAAGATCAAGAGCATCAAGTCGCTAAAGAAGAAAGCTTGTCAATTGGAACCAGTC
8	5	1.32937	0.763548	0.95316	0.352234	0.598872	0.303387	0.332593	0.0375693	0.13231	0.0801832			0.66188	0.0833543	0.00673436	GCCAA	GCAAATGGCATTCTGACATCCCTTCAAGCAGAGCTTCCCCGAGGGCTTCACCTGGGAGAGAACCACCACCTACGAGGACGGCGGCATCCTGACCGCCCACCAGGACACCAGCCTGGAGGGCAACTGCCTGATCTACAAGGCCAAGTTGACCAGTGCCGTTCCGGTGCTCACCGCGCGCGACGTCGCCGGAGCGGTCGAGTTCTGGACCGACCGGCTCGGGTTCTCCCGGGACTTCGTGGAGGACGACTTCGCCGGCTTGTCAATTGGAACCAGTC
8	6	0.274016	0.237197	0.0491686	0.111925	0.122252	0.235571	0.0408182	0.0112708	0.0895515	0.0482026			0.152993	0.049675	0.0414646	-	GCAAATGGCATTCTGACATCCCTTCAAGCAGAGCTTCCCCGAGGGCTTCACCTGGGAGAGAACCACCACCTACGAGGACGGCGGCATCCTGACCGCCCACCAGGACACCAGCCTGGAGGGCAACTGCCTGATCTACAAGGCCAATTCCAGCTTGAGGTCGTGTCCACGAACTTCCGGGACGCCTCCGGGCCGGCCATGACCGAGATCGGCGAGCAGCCGTGGGGGCGGGAGTTCGCCCTGCGCGACCCGGCCGGCAACTGCGTGCACTTCGTGCTTGTCAATTGGAACCAGTC
8	7	0.32099	0.352407	0.0752338	0.128384	0.185444	0.24271	0.113384	0.0200369	0.20855	0.0486661			0.20265	0.0924177	0.195645		GCAAATGGCATTCTGACATCCCTTCAAGCAGAGCTTCCCCGAGGGCTTCACCTGGGAGAGAACCACCACCTACGAGGACGGCGGCATCCTGACCGCCCACCAGGACACCAGCCTGGAGGGCAACTGCCTGATCTACAAGGCCAATTCCCTAGCAGCATGAGAATCCACGTGACCGAGGGCGCCCCCCTGCCCTTCGCCTTCGACATCCTGGCCCCCTGCTGCGAGTACGGCAGCAGGACCTTCGTGCACCACACCGCCGAGATCCCCGACTTGCTTGTCAATTGGAACCAGTC
8	8	1.35912	1.10014	0.27487	0.951362	0.593915	0.977978	0.0362828	0.29304	1.3469	1.80065			0.756238	1.14686	0.482853		GCAAATGGCATTCTGACATCCCTTCAAGCAGAGCTTCCCCGAGGGCTTCACCTGGGAGAGAACCACCACCTACGAGGACGGCGGCATCCTGACCGCCCACCAGGACACCAGCCTGGAGGGCAACTGCCTGATCTACAAGGCCAATTCCATCTGAAGGTGCACGGCACCAACTTCCCCGCCGACGGCCCCGTGATGAAGAACAAGAGCGGCGGCTGGGAGCCCAGCACCGAGGTGGTGTACCCCGAGAACGGCGTGCTGTGCGGCCGGAACGCTTGTCAATTGGAACCAGTC
8	9	0.905034	0.734181	0.296789	0.371986	0.503878	0.642467	0.175367	0.217902	0.591363	0.300571			0.518529	0.369945	0.364796		GCAAATGGCATTCTGACATCCCTTCAAGCAGAGCTTCCCCGAGGGCTTCACCTGGGAGAGAACCACCACCTACGAGGACGGCGGCATCCTGACCGCCCACCAGGACACCAGCCTGGAGGGCAACTGCCTGATCTACAAGGCCAATTCCATCAACCAGTAACGTTATACGATGTCGCAGAGTATGCCGGTGTCTCTTATCAGACCGTTTCCCGCGTGGTGAACCAGGCCAGCCACGTTTCTGCGAAAACGCGGGAAAAAGTGGAAGCGGCGGCTTGTCAATTGGAACCAGTC
9	1	1.46403	0.894572	0.406974	0.969468	0.872288	1.39201	0.852646	0.185968	0.399755	0.28713			0.978855	0.290951	0.00183748	-	GCAAATGGCATTCTGACATCCGTGATGGCCCTGAAGGTGGGCGACCGGCACCTGATCTGCCACCACTACACCAGCTACCGGAGCAAGAAGGCCGTGCGCGCCCTGACCATGCCCGGCTTCCACTTCACCGACATCCGGCTCCATGGGGAAAGACGGTGAGCTGGTGATATGGGATAGTGTTCACCCTTGTTACACCGTTTTCCATGAGCAAACTGAAACGTTTTCATCGCTCTGGAGTGAATACCACGACGATTTCCGGCAGTTTCTGCTTGTCAATTGGAACCAGTC
9	2	4.01472	4.23792	0.888589	1.5686	2.84278	2.03448	3.68422	1.04756	1.8108	0.572406			2.75304	1.14359	0.0308247	-	GCAAATGGCATTCTGACATCCGTGATGGCCCTGAAGGTGGGCGACCGGCACCTGATCTGCCACCACTACACCAGCTACCGGAGCAAGAAGGCCGTGCGCGCCCTGACCATGCCCGGCTTCCACTTCACCGACATCCGGCTCCATGGCTGATTATGGACAACTTCTTCGCCCCCGTTTTCACCATGGGCAAATATTATACGCAAGGCGACAAGGTGCTGATGCCGCTGGCGATTCAGGTTCATCATGCCGTCTGTGATGGCTTCCATGTCGGCTTGTCAATTGGAACCAGTC
9	3	0.131527	0.0384033	0.0124402	0.0427948	0.0421275	0.239141	0.00302357	0.00187846	0.00847109	0.0194664			0.0727796	0.00993866	0.0971801		GCAAATGGCATTCTGACATCCGTGATGGCCCTGAAGGTGGGCGACCGGCACCTGATCTGCCACCACTACACCAGCTACCGGAGCAAGAAGGCCGTGCGCGCCCTGACCATGCCCGGCTTCCACTTCACCGACATCCGGCTCCATGACGTCTGGCTACATTGTATTGGCATGTAAAAAATAAGCGGGCTTTGCTCGACGCCTTAGCCATTGAGATGTTAGATAGGCACCATACTCACTTTTGCCCTTTAGAAGGGGAAAGCTGGCAAGATTTTGCTTGTCAATTGGAACCAGTC
9	4	0.023487	0.0135541	0.00296196	0.00164596	0.00660824	0.00713852	0	0	0.00161354	0.000926973			0.00791369	0.000846838	0.0630755		GCAAATGGCATTCTGACATCCGTGATGGCCCTGAAGGTGGGCGACCGGCACCTGATCTGCCACCACTACACCAGCTACCGGAGCAAGAAGGCCGTGCGCGCCCTGACCATGCCCGGCTTCCACTTCACCGACATCCGGCTCCATGAGCTTTGGCTTTTTATGCCAACAAGGTTTTTCACTAGAGAATGCATTATATGCACTCAGCGCTGTGGGGCATTTTACTTTAGGTTGCGTATTGGAAGATCAAGAGCATCAAGTCGCTAAAGAAGAAAGCTTGTCAATTGGAACCAGTC
9	5	0.582479	0.702555	0.298566	0.246893	0.203203	0.199879	0.243397	0.0532231	0.196045	0.0822689			0.353853	0.110512	0.0247193	CATG	GCAAATGGCATTCTGACATCCGTGATGGCCCTGAAGGTGGGCGACCGGCACCTGATCTGCCACCACTACACCAGCTACCGGAGCAAGAAGGCCGTGCGCGCCCTGACCATGCCCGGCTTCCACTTCACCGACATCCGGCTCCATGGCCAAGTTGACCAGTGCCGTTCCGGTGCTCACCGCGCGCGACGTCGCCGGAGCGGTCGAGTTCTGGACCGACCGGCTCGGGTTCTCCCGGGACTTCGTGGAGGACGACTTCGCCGGCTTGTCAATTGGAACCAGTC
9	6	0.151883	0.248492	0.260653	0.0905275	0.0603002	0.0499697	0.0710539	0.0156539	0.0782567	0.0229426			0.133268	0.0389511	0.0423766	TG	GCAAATGGCATTCTGACATCCGTGATGGCCCTGAAGGTGGGCGACCGGCACCTGATCTGCCACCACTACACCAGCTACCGGAGCAAGAAGGCCGTGCGCGCCCTGACCATGCCCGGCTTCCACTTCACCGACATCCGGCTCCATGAGGTCGTGTCCACGAACTTCCGGGACGCCTCCGGGCCGGCCATGACCGAGATCGGCGAGCAGCCGTGGGGGCGGGAGTTCGCCCTGCGCGACCCGGCCGGCAACTGCGTGCACTTCGTGCTTGTCAATTGGAACCAGTC
9	7	2.3581	2.59109	0.7553	1.30853	2.4149	0.453296	5.36835	5.56714	4.92211	1.06115			2.17851	3.85013	0.361124		GCAAATGGCATTCTGACATCCGTGATGGCCCTGAAGGTGGGCGACCGGCACCTGATCTGCCACCACTACACCAGCTACCGGAGCAAGAAGGCCGTGCGCGCCCTGACCATGCCCGGCTTCCACTTCACCGACATCCGGCTCCATGCAGCATGAGAATCCACGTGACCGAGGGCGCCCCCCTGCCCTTCGCCTTCGACATCCTGGCCCCCTGCTGCGAGTACGGCAGCAGGACCTTCGTGCACCACACCGCCGAGATCCCCGACTTGCTTGTCAATTGGAACCAGTC
9	8	1.89306	1.58583	0.425338	0.760431	0.513378	0.574651	0.107337	0.0889139	0.672443	0.38284			0.837146	0.381399	0.166587		GCAAATGGCATTCTGACATCCGTGATGGCCCTGAAGGTGGGCGACCGGCACCTGATCTGCCACCACTACACCAGCTACCGGAGCAAGAAGGCCGTGCGCGCCCTGACCATGCCCGGCTTCCACTTCACCGACATCCGGCTCCATGATCTGAAGGTGCACGGCACCAACTTCCCCGCCGACGGCCCCGTGATGAAGAACAAGAGCGGCGGCTGGGAGCCCAGCACCGAGGTGGTGTACCCCGAGAACGGCGTGCTGTGCGGCCGGAACGCTTGTCAATTGGAACCAGTC
9	9	5.16402	5.26126	0.882665	5.40861	4.49319	2.73049	3.34104	3.0118	4.00037	2.77953			3.89732	3.2639	0.414457		GCAAATGGCATTCTGACATCCGTGATGGCCCTGAAGGTGGGCGACCGGCACCTGATCTGCCACCACTACACCAGCTACCGGAGCAAGAAGGCCGTGCGCGCCCTGACCATGCCCGGCTTCCACTTCACCGACATCCGGCTCCATGATCAACCAGTAACGTTATACGATGTCGCAGAGTATGCCGGTGTCTCTTATCAGACCGTTTCCCGCGTGGTGAACCAGGCCAGCCACGTTTCTGCGAAAACGCGGGAAAAAGTGGAAGCGGCGGCTTGTCAATTGGAACCAGTC
supplemental table 4
Plasmid assay data for the most frequent inter- and intramolecular junctions in CLL and B cells including sequences.
